# Supplementary material for: Effects of Incorporation of Porous Tapioca Starch on the Quality of White Salted (Udon) Noodles
Source: MDPI journal article supplement (doi:10.3390/foods12081662), 2023-04-16
Supplement: s1 [file s1]

**Table S1** Cooking quality and textural attributes of noodles

| Wheat variety | % Porous starch added | Sample ID | Optimal cooking time (min) | Cooking loss (%) | Water absorption (%) | Texture, g Force | Turbidity (Au) |
|---------------|-----------------------|-----------|----------------------------|------------------|----------------------|------------------|----------------|
| Commercial    | 0                     | C0        | 11.10 ±0.10                | 3.695± 0.005     | 119.39 ± 0.10        | 2952 ±17.50      | 0.35 ±0.03     |
|               | 5                     | C5        | 10.60± 0.16                | 3.7± 0.08        | 101.34 ±0.07         | 3494 ±5.77       | 0.38± 0.01     |
|               | 10                    | C10       | 10.35 ±0.12                | 4.55± 0.04       | 131.03 ±0.06         | 2646.5±120.51    | 0.5± 0.01      |
| Mace          | 0                     | M0        | 9.35 ±0.05                 | 4.6± 0.10        | 94.65 ±0.09          | 4180±150.13      | 0.42± 0.01     |
|               | 5                     | M5        | 8.4 ±0.10                  | 4.7±0.10         | 96.17 ±0.92          | 3707 ±57.73      | 0.49± 0.01     |
|               | 10                    | M10       | 8 ± 0.00                   | 4.95±0.10        | 100.47 ±3.35         | 2678 ±56.01      | 0.51 ±0.01     |
| Zen           | 0                     | Z0        | 10.25± 0.25                | 4.55 ±0.05       | 100.38 ±0.14         | 3840.67 ±103.94  | 0.43± 0.01     |
|               | 5                     | Z5        | 7.35 ±0.15                 | 4.86± 0.35       | 80.52 ±0.08          | 4647 ±85.73      | 0.46 ±0.01     |
|               | 10                    | Z10       | 7.05 ±0.05                 | 4.97±0.35        | 82.71 ±0.12          | 4043.33 ±330.44  | 0.56 ±0.01     |
| Kinsei        | 0                     | K0        | 9.11 ±0.01                 | 2.8 ±0.10        | 86.3 ±0.06           | 3739 ±180.14     | 0.37± 0.01     |
|               | 5                     | K5        | 7.45± 0.05                 | 4.745 ±0.04      | 98.76 ±0.43          | 2943.67 ±168.30  | 0.5 ±0.01      |
|               | 10                    | K10       | 7.27 ±0.07                 | 4.96± 0.05       | 97.68 ±0.46          | 2409.33± 92.76   | 0.54± 0.01     |
| Ninja         | 0                     | N0        | 10.425 ±0.02               | 4.315±0.11       | 99.77 ±0.23          | 4318.33 ±95.885  | 0.4 ±0.01      |
|               | 5                     | N5        | 8.09 ±0.09                 | 4.63 ±0.07       | 86.49± 1.14          | 2496 ±334.31     | 0.48± 0.01     |
|               | 10                    | N10       | 8.05 ±0.05                 | 4.69± 0.09       | 91.82 ±1.60          | 2876.33± 73.87   | 0.52± 0.23     |

**Table S2** Pairwise comparisons of different quality attributes of udon noodles among wheat varieties

| PS | Factors        |                | OCT                |            | WAC                |            | Cooking loss       |            | Turbidity          |            | Texture            |            |
|----|----------------|----------------|--------------------|------------|--------------------|------------|--------------------|------------|--------------------|------------|--------------------|------------|
|    | (I)<br>Variety | (J)<br>Variety | Mean Diff<br>(I-J) | P<br>value |
| 0  | Com            | Kinsei         | 1.985*             | <.001      | 33.095*            | <.001      | .895*              | <.001      | -.020              | .123       | -592.5*            | .047       |
|    |                | Mace           | 1.750*             | <.001      | 24.745*            | <.001      | -.905*             | <.001      | -.070*             | <.001      | -1141.0*           | <.001      |
|    |                | Ninja          | .675*              | <.001      | 19.625*            | <.001      | -.620*             | <.001      | -.050*             | <.001      | -1332.0*           | <.001      |
|    |                | Zen            | .850*              | <.001      | 19.010*            | <.001      | -.860*             | <.001      | -.085*             | <.001      | -962.0*            | .003       |
|    | Kinsei         | Com            | -1.985*            | <.001      | -33.095*           | <.001      | -.895*             | <.001      | .020               | .123       | 592.5*             | .047       |
|    |                | Mace           | -.235              | .131       | -8.350*            | <.001      | -1.800*            | <.001      | -.050*             | <.001      | -548.5             | .063       |
|    |                | Ninja          | -1.310*            | <.001      | -13.470*           | <.001      | -1.515*            | <.001      | -.030*             | .027       | -739.5*            | .016       |
|    |                | Zen            | -1.135*            | <.001      | -14.085*           | <.001      | -1.755*            | <.001      | -.065*             | <.001      | -369.5             | .197       |
|    | Mace           | Com            | -1.750*            | <.001      | -24.745*           | <.001      | .905*              | <.001      | .070*              | <.001      | 1141.0*            | <.001      |
|    |                | Kinsei         | .235               | .131       | 8.350*             | <.001      | 1.800*             | <.001      | .050*              | <.001      | 548.5              | .063       |
|    |                | Ninja          | -1.075*            | <.001      | -5.120*            | .004       | .285*              | .027       | .020               | .123       | -191.0             | .495       |
|    |                | Zen            | -.900*             | <.001      | -5.735*            | .002       | .045               | .704       | -.015              | .240       | 179.0              | .523       |
|    | Ninja          | Com            | -.675*             | <.001      | -19.625*           | <.001      | .620*              | <.001      | .050*              | <.001      | 1332.0*            | <.001      |
|    |                | Kinsei         | 1.310*             | <.001      | 13.470*            | <.001      | 1.515*             | <.001      | .030*              | .027       | 739.5*             | .016       |
|    |                | Mace           | 1.075*             | <.001      | 5.120*             | .004       | -.285*             | .027       | -.020              | .123       | 191.0              | .495       |
|    |                | Zen            | .175               | .252       | -.615              | .684       | -.240              | .057       | -.035*             | .012       | 370.0              | .196       |
|    | Zen            | Com            | -.850*             | <.001      | -19.010*           | <.001      | .860*              | <.001      | .085*              | <.001      | 962.0*             | .003       |
|    |                | Kinsei         | 1.135*             | <.001      | 14.085*            | <.001      | 1.755*             | <.001      | .065*              | <.001      | 369.5              | .197       |
|    |                | Mace           | .900*              | <.001      | 5.735*             | .002       | -.045              | .704       | .015               | .240       | -179.0             | .523       |
|    |                | Ninja          | -.175              | .252       | .615               | .684       | .240               | .057       | .035*              | .012       | -370.0             | .196       |
| 5  | Com            | Kinsei         | 3.150*             | <.001      | 2.575              | .103       | -1.045*            | <.001      | -.120*             | <.001      | 584.5*             | .049       |
|    |                | Mace           | 2.200*             | <.001      | 5.165*             | .003       | -1.000*            | <.001      | -.110*             | <.001      | -268.0             | .342       |
|    |                | Ninja          | 2.510*             | <.001      | 14.850*            | <.001      | -.930*             | <.001      | -.100*             | <.001      | 1259.0*            | <.001      |
|    |                | Zen            | 3.250*             | <.001      | 20.815*            | <.001      | -1.165*            | <.001      | -.080*             | <.001      | -1084.0*           | .001       |
|    | Kinsei         | Com            | -3.150*            | <.001      | -2.575             | .103       | 1.045*             | <.001      | .120*              | <.001      | -584.5*            | .049       |
|    |                | Mace           | -.950*             | <.001      | 2.590              | .101       | .045               | .704       | .010               | .427       | -852.5*            | .007       |
|    |                | Ninja          | -.640*             | <.001      | 12.275*            | <.001      | .115               | .338       | .020               | .123       | 674.5*             | .026       |
|    |                | Zen            | .100               | .507       | 18.240*            | <.001      | -.120              | .318       | .040*              | .005       | -1668.5*           | <.001      |
|    | Mace           | Com            | -2.200*            | <.001      | -5.165*            | .003       | 1.000*             | <.001      | .110*              | <.001      | 268.0              | .342       |
|    |                | Kinsei         | .950*              | <.001      | -2.590             | .101       | -.045              | .704       | -.010              | .427       | 852.5*             | .007       |
|    |                | Ninja          | .310               | .052       | 9.685*             | <.001      | .070               | .556       | .010               | .427       | 1527.0*            | <.001      |
|    |                | Zen            | 1.050*             | <.001      | 15.650*            | <.001      | -.165              | .176       | .030*              | .027       | -816.0*            | .009       |
|    | Ninja          | Com            | -2.510*            | <.001      | -14.850*           | <.001      | .930*              | <.001      | .100*              | <.001      | -1259.0*           | <.001      |
|    |                | Kinsei         | .640*              | <.001      | -12.275*           | <.001      | -.115              | .338       | -.020              | .123       | -674.5*            | .026       |
|    |                | Mace           | -.310              | .052       | -9.685*            | <.001      | -.070              | .556       | -.010              | .427       | -1527.0*           | <.001      |
|    |                | Zen            | .740*              | <.001      | 5.965*             | .001       | -.235              | .061       | .020               | .123       | -2343.0*           | <.001      |
|    | Zen            | Com            | -3.250*            | <.001      | -20.815*           | <.001      | 1.165*             | <.001      | .080*              | <.001      | 1084.0*            | .001       |
|    |                | Kinsei         | -.100              | .507       | -18.240*           | <.001      | .120               | .318       | -.040*             | .005       | 1668.5*            | <.001      |
|    |                | Mace           | -1.050*            | <.001      | -15.650*           | <.001      | .165               | .176       | -.030*             | .027       | 816.0*             | .009       |
|    |                | Ninja          | -.740*             | <.001      | -5.965*            | .001       | .235               | .061       | -.020              | .123       | 2343.0*            | <.001      |
| 10 | Com            | Kinsei         | 3.075*             | <.001      | 33.350*            | <.001      | -.410*             | .003       | -.010              | .427       | 171.25             | .540       |

|        |        |         |       |          |       |        |      |        |       |           |       |
|--------|--------|---------|-------|----------|-------|--------|------|--------|-------|-----------|-------|
|        | Mace   | 2.350*  | <.001 | 30.565*  | <.001 | -.400* | .004 | .020   | .123  | -71.75    | .797  |
|        | Ninja  | 2.300*  | <.001 | 39.215*  | <.001 | -.140  | .247 | .010   | .427  | -282.25   | .318  |
|        | Zen    | 3.300*  | <.001 | 48.325*  | <.001 | -.425* | .002 | -.030* | .027  | -1596.75* | <.001 |
| Kinsei | Com    | -3.075* | <.001 | -33.350* | <.001 | .410*  | .003 | .010   | .427  | -171.25   | .540  |
|        | Mace   | -.725*  | <.001 | -2.785   | .080  | .010   | .933 | .030*  | .027  | -243.0    | .388  |
|        | Ninja  | -.775*  | <.001 | 5.865*   | .001  | .270*  | .035 | .020   | .123  | -453.5    | .118  |
|        | Zen    | .225    | .147  | 14.975*  | <.001 | -.015  | .899 | -.020  | .123  | -1768.0*  | <.001 |
| Mace   | Com    | -2.350* | <.001 | -30.565* | <.001 | .400*  | .004 | -.020  | .123  | 71.75     | .797  |
|        | Kinsei | .725*   | <.001 | 2.785    | .080  | -.010  | .933 | -.030* | .027  | 243.0     | .388  |
|        | Ninja  | -.050   | .738  | 8.650*   | <.001 | .260*  | .041 | -.010  | .427  | -210.5    | .453  |
|        | Zen    | .950*   | <.001 | 17.760*  | <.001 | -.025  | .833 | -.050* | <.001 | -1525.0*  | <.001 |
| Ninja  | Com    | -2.300* | <.001 | -39.215* | <.001 | .140   | .247 | -.010  | .427  | 282.25    | .318  |
|        | Kinsei | .775*   | <.001 | -5.865*  | .001  | -.270* | .035 | -.020  | .123  | 453.5     | .118  |
|        | Mace   | .050    | .738  | -8.650*  | <.001 | -.260* | .041 | .010   | .427  | 210.5     | .453  |
|        | Zen    | 1.000*  | <.001 | 9.110*   | <.001 | -.285* | .027 | -.040* | .005  | -1314.5*  | <.001 |
| Zen    | Com    | -3.300* | <.001 | -48.325* | <.001 | .425*  | .002 | .030*  | .027  | 1596.75*  | <.001 |
|        | Kinsei | -.225   | .147  | -14.975* | <.001 | .015   | .899 | .020   | .123  | 1768.0*   | <.001 |
|        | Mace   | -.950*  | <.001 | -17.760* | <.001 | .025   | .833 | .050*  | <.001 | 1525.0*   | <.001 |
|        | Ninja  | -1.000* | <.001 | -9.110*  | <.001 | .285*  | .027 | .040*  | .005  | 1314.5*   | <.001 |

---

**Table S3** Pairwise comparisons of different quality attributes of udon noodles among added porous starch

| Factors |           |           | OCT                |            | WAC                |            | Cooking loss       |            | Turbidity          |            | Texture            |            |
|---------|-----------|-----------|--------------------|------------|--------------------|------------|--------------------|------------|--------------------|------------|--------------------|------------|
| Variety | (I)<br>PS | (J)<br>PS | Mean Diff<br>(I-J) | P<br>value |
| Com     | 0         | 5         | .500*              | .004       | 18.055*            | <.001      | -.005              | .966       | -.030*             | .027       | -519.5             | .077       |
|         |           | 10        | .750*              | <.001      | -11.640*           | <.001      | -.855*             | <.001      | -.180*             | <.001      | 314.75             | .268       |
|         | 5         | 0         | -.500*             | .004       | -18.055*           | <.001      | .005               | .966       | .030*              | .027       | 519.5              | .077       |
|         |           | 10        | .250               | .110       | -29.695*           | <.001      | -.850*             | <.001      | -.150*             | <.001      | 834.25*            | .008       |
|         | 10        | 0         | -.750*             | <.001      | 11.640*            | <.001      | .855*              | <.001      | .180*              | <.001      | -314.75            | .268       |
|         |           | 5         | -.250              | .110       | 29.695*            | <.001      | .850*              | <.001      | .150*              | <.001      | -834.25*           | .008       |
| Kinsei  | 0         | 5         | 1.665*             | <.001      | -12.465*           | <.001      | -1.945*            | <.001      | -.130*             | <.001      | 657.5*             | .030       |
|         |           | 10        | 1.840*             | <.001      | -11.385*           | <.001      | -2.160*            | <.001      | -.170*             | <.001      | 1078.5*            | .001       |
|         | 5         | 0         | -1.665*            | <.001      | 12.465*            | <.001      | 1.945*             | <.001      | .130*              | <.001      | -657.5*            | .030       |
|         |           | 10        | .175               | .252       | 1.080              | .477       | -.215              | .084       | -.040*             | .005       | 421.0              | .144       |
|         | 10        | 0         | -1.840*            | <.001      | 11.385*            | <.001      | 2.160*             | <.001      | .170*              | <.001      | -1078.5*           | .001       |
|         |           | 5         | -.175              | .252       | -1.080             | .477       | .215               | .084       | .040*              | .005       | -421.0             | .144       |
| Mace    | 0         | 5         | .950*              | <.001      | -1.525             | .320       | -.100              | .403       | -.070*             | <.001      | 353.5              | .216       |
|         |           | 10        | 1.350*             | <.001      | -5.820*            | .001       | -.350*             | .009       | -.090*             | <.001      | 1384.0*            | <.001      |
|         | 5         | 0         | -.950*             | <.001      | 1.525              | .320       | .100               | .403       | .070*              | <.001      | -353.5             | .216       |
|         |           | 10        | .400*              | .016       | -4.295*            | .011       | -.250*             | .048       | -.020              | .123       | 1030.5*            | .002       |
|         | 10        | 0         | -1.350*            | <.001      | 5.820*             | .001       | .350*              | .009       | .090*              | <.001      | -1384.0*           | <.001      |
|         |           | 5         | -.400*             | .016       | 4.295*             | .011       | .250*              | .048       | .020               | .123       | -1030.5*           | .002       |
| Ninja   | 0         | 5         | 2.335*             | <.001      | 13.280*            | <.001      | -.315*             | .016       | -.080*             | <.001      | 2071.5*            | <.001      |
|         |           | 10        | 2.375*             | <.001      | 7.950*             | <.001      | -.375*             | .006       | -.120*             | <.001      | 1364.5*            | <.001      |
|         | 5         | 0         | -2.335*            | <.001      | -13.280*           | <.001      | .315*              | .016       | .080*              | <.001      | -2071.5*           | <.001      |
|         |           | 10        | .040               | .789       | -5.330*            | .003       | -.060              | .613       | -.040*             | .005       | -707.0*            | .021       |
|         | 10        | 0         | -2.375*            | <.001      | -7.950*            | <.001      | .375*              | .006       | .120*              | <.001      | -1364.5*           | <.001      |
|         |           | 5         | -.040              | .789       | 5.330*             | .003       | .060               | .613       | .040*              | .005       | 707.0*             | .021       |
| Zen     | 0         | 5         | 2.900*             | <.001      | 19.860*            | <.001      | -.310*             | .018       | -.025              | .059       | -641.5*            | .033       |
|         |           | 10        | 3.200*             | <.001      | 17.675*            | <.001      | -.420*             | .003       | -.125*             | <.001      | -320.0             | .260       |
|         | 5         | 0         | -2.900*            | <.001      | -19.860*           | <.001      | .310*              | .018       | .025               | .059       | 641.5*             | .033       |
|         |           | 10        | .300               | .059       | -2.185             | .161       | -.110              | .359       | -.100*             | <.001      | 321.5              | .258       |
|         | 10        | 0         | -3.200*            | <.001      | -17.675*           | <.001      | .420*              | .003       | .125*              | <.001      | 320.0              | .260       |
|         |           | 5         | -.300              | .059       | 2.185              | .161       | .110               | .359       | .100*              | <.001      | -321.5             | .258       |

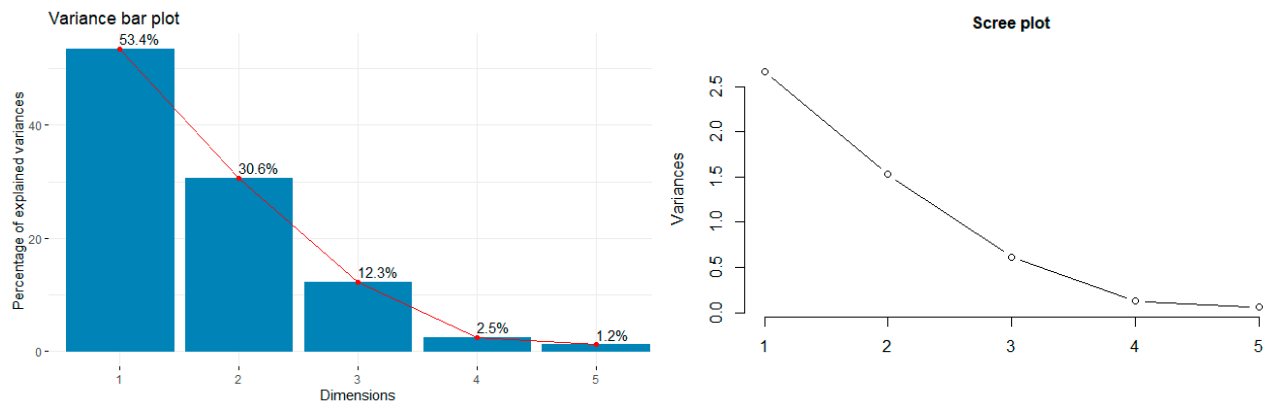

**Figure S1.** Variance bar plot and screen plot showing percentage of explained variances and eigen values of the principal components.

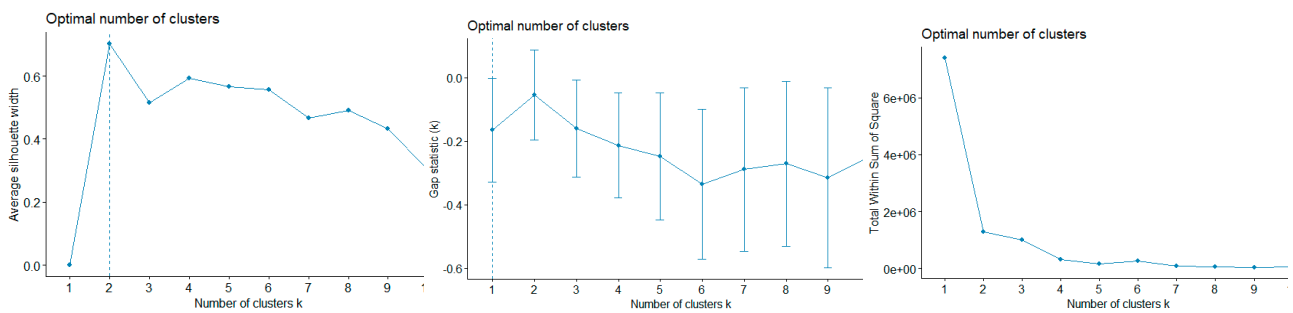

**Figure S2.** Results of optimum number of clusters as obtained from Silhouette, Gap statistic, and Elbow methods.
